# Supplementary material for: Prediction of key genes and pathways involved in trastuzumab-resistant gastric cancer
Source: Springer Nature journal article supplement (doi:10.1186/s12957-018-1475-6), 2018-08-22

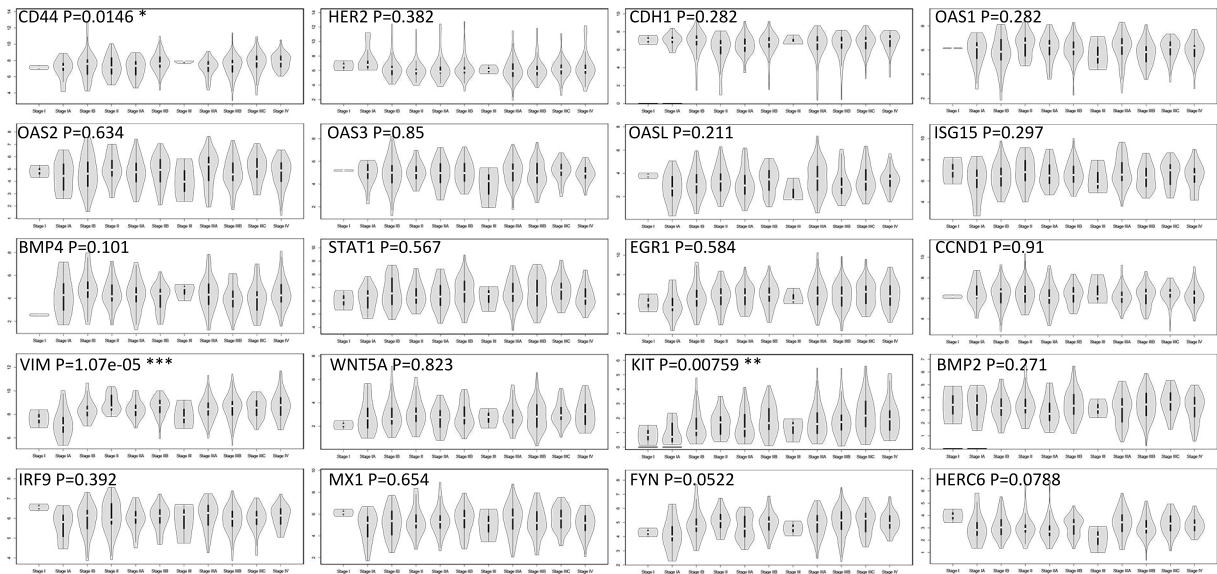

Supplement: 12957_2018_1475_MOESM4_ESM.pdf [file 12957_2018_1475_MOESM4_ESM.pdf]
